# Supplementary material for: Maternal LPS Exposure Enhances the 5-HT Level in the Prefrontal Cortex of Autism-like Young Offspring
Source: MDPI journal article supplement (doi:10.3390/brainsci13060958), 2023-06-15
Supplement: s1 [file s1]

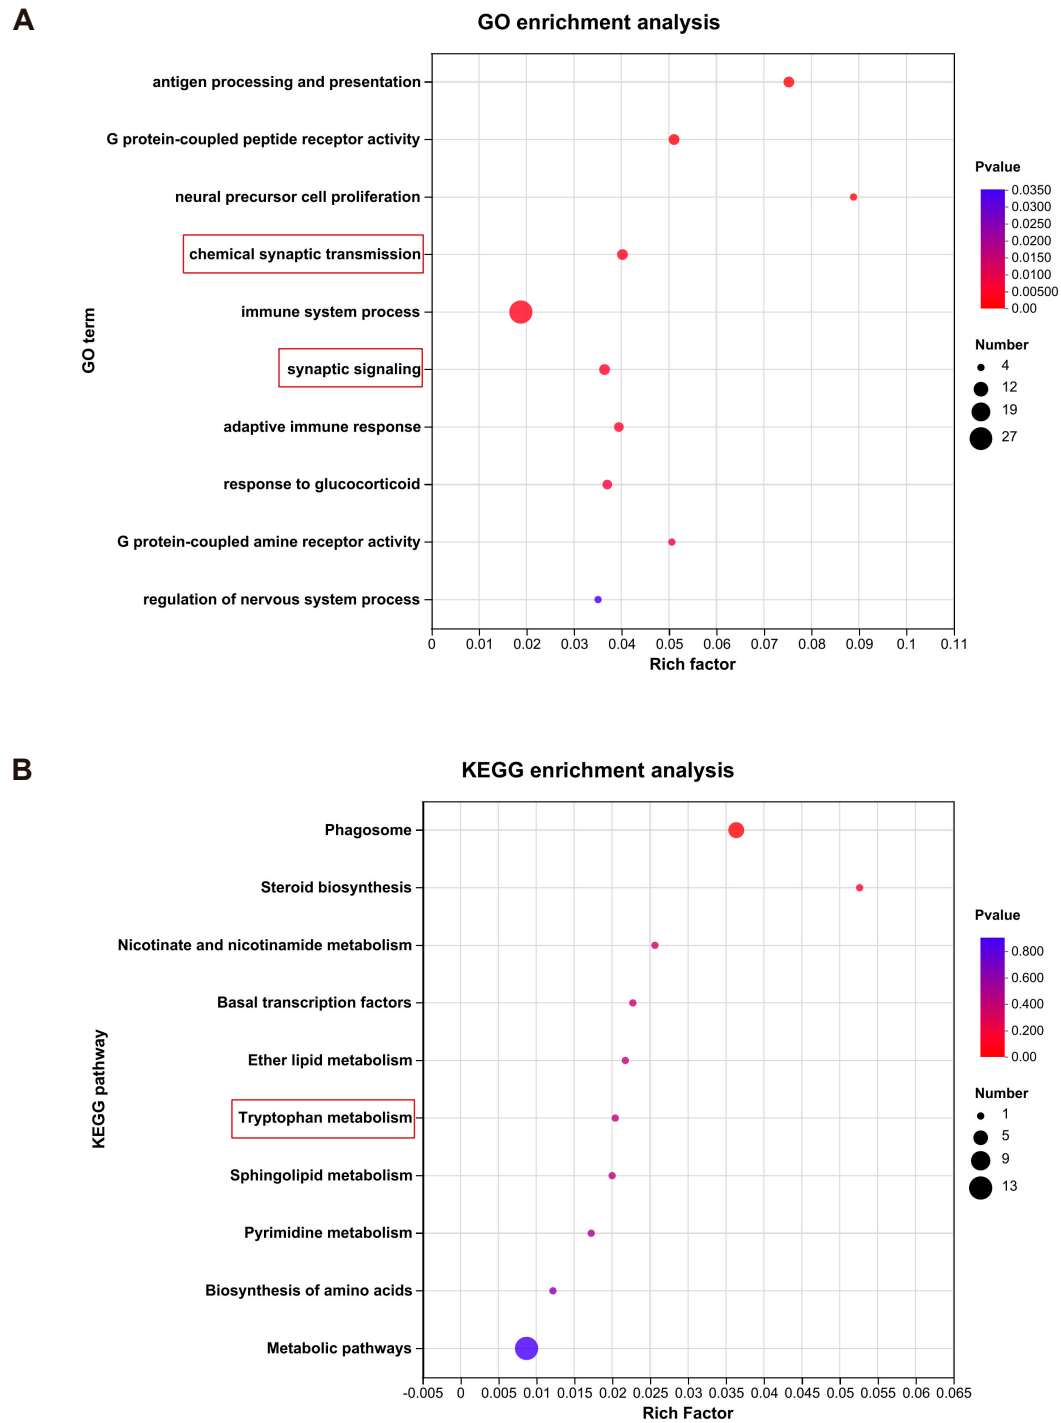

**Figure S1.** RNA-seq analysis of the offspring rat mPFC between the LPS and PBS two treatment groups during gestational period (n=10 per group). **(A)** Representative significantly enriched GO pathways. **(B)** Representative significantly enriched KEGG pathways.
